# Supplementary material
Source: PubMed Central journal article supplement (PMC4357926)
Supplement: AEM.03678-14_zam999116126so1.pdf [file AEM.03678-14_zam999116126so1.pdf]

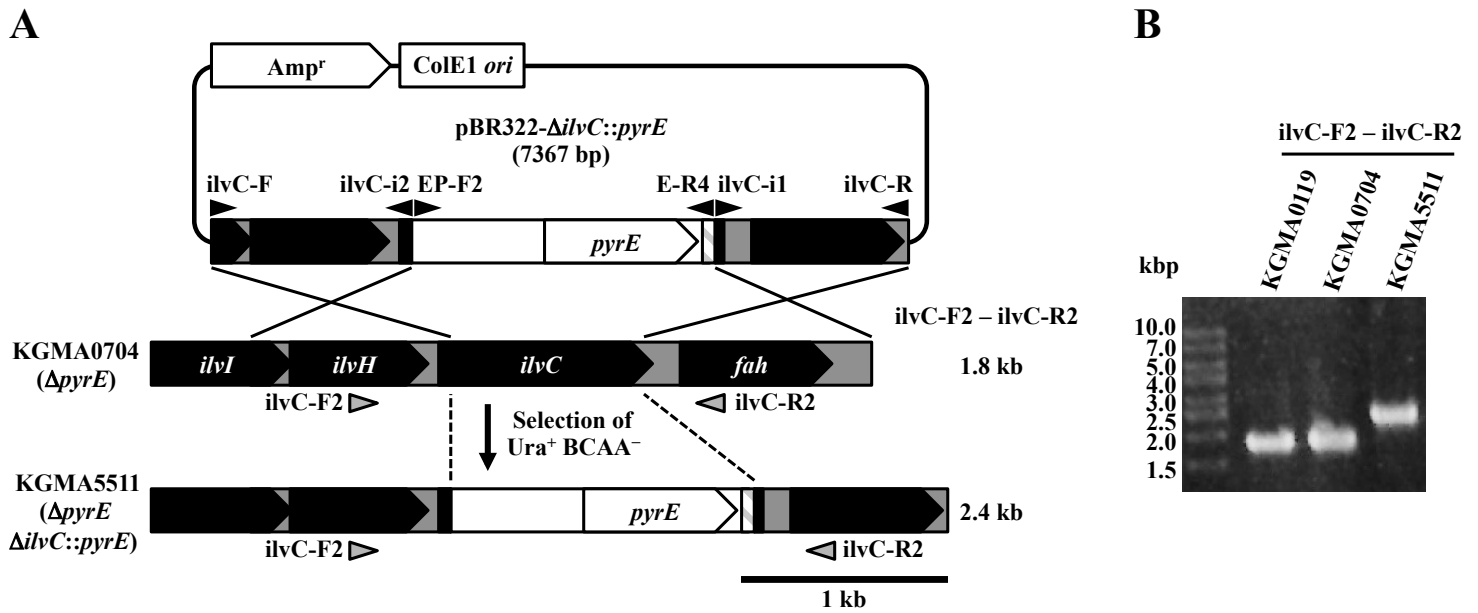

**FIG. S1.** Isolation and genotyping of *ilvC* disruptant. (A) Schematic diagram for the isolation of the *ilvC* disruptant. Black and gray arrowheads indicate primers used for the construction of the *ilvC* disruption vector and genotyping by PCR (see Fig. S1B), respectively. *ilvI*, acetohydroxyacid synthase large subunit; *ilvH*, acetohydroxyacid synthase small regulatory subunit; *ilvC*, acetohydroxyacid isomeroreductase; *fah*, fumarylacetoacetate hydroxylase. (B) Genotyping of the *ilvC* loci of KGMA0119 (wild-type) and its derivatives by PCR. The *ilvC* loci of KGMA0119, KGMA0704 ( $\Delta pyrE$ ), and KGMA5511 ( $\Delta pyrE \Delta ilvC::pyrE$ ) strains were amplified from total DNA using primers *ilvC*-F2 and *ilvC*-R2. See Figure S1A for the annealing position of each primer.
